# Supplementary material
Source: publisher site journal article supplement (https://arthropod-systematics.arphahub.com/article/67569/download/suppl/34/)
Supplement: Supplementary file 1

## Supplement 4

**Figure S3:** Terminologies for male genitalia and subgenital plate

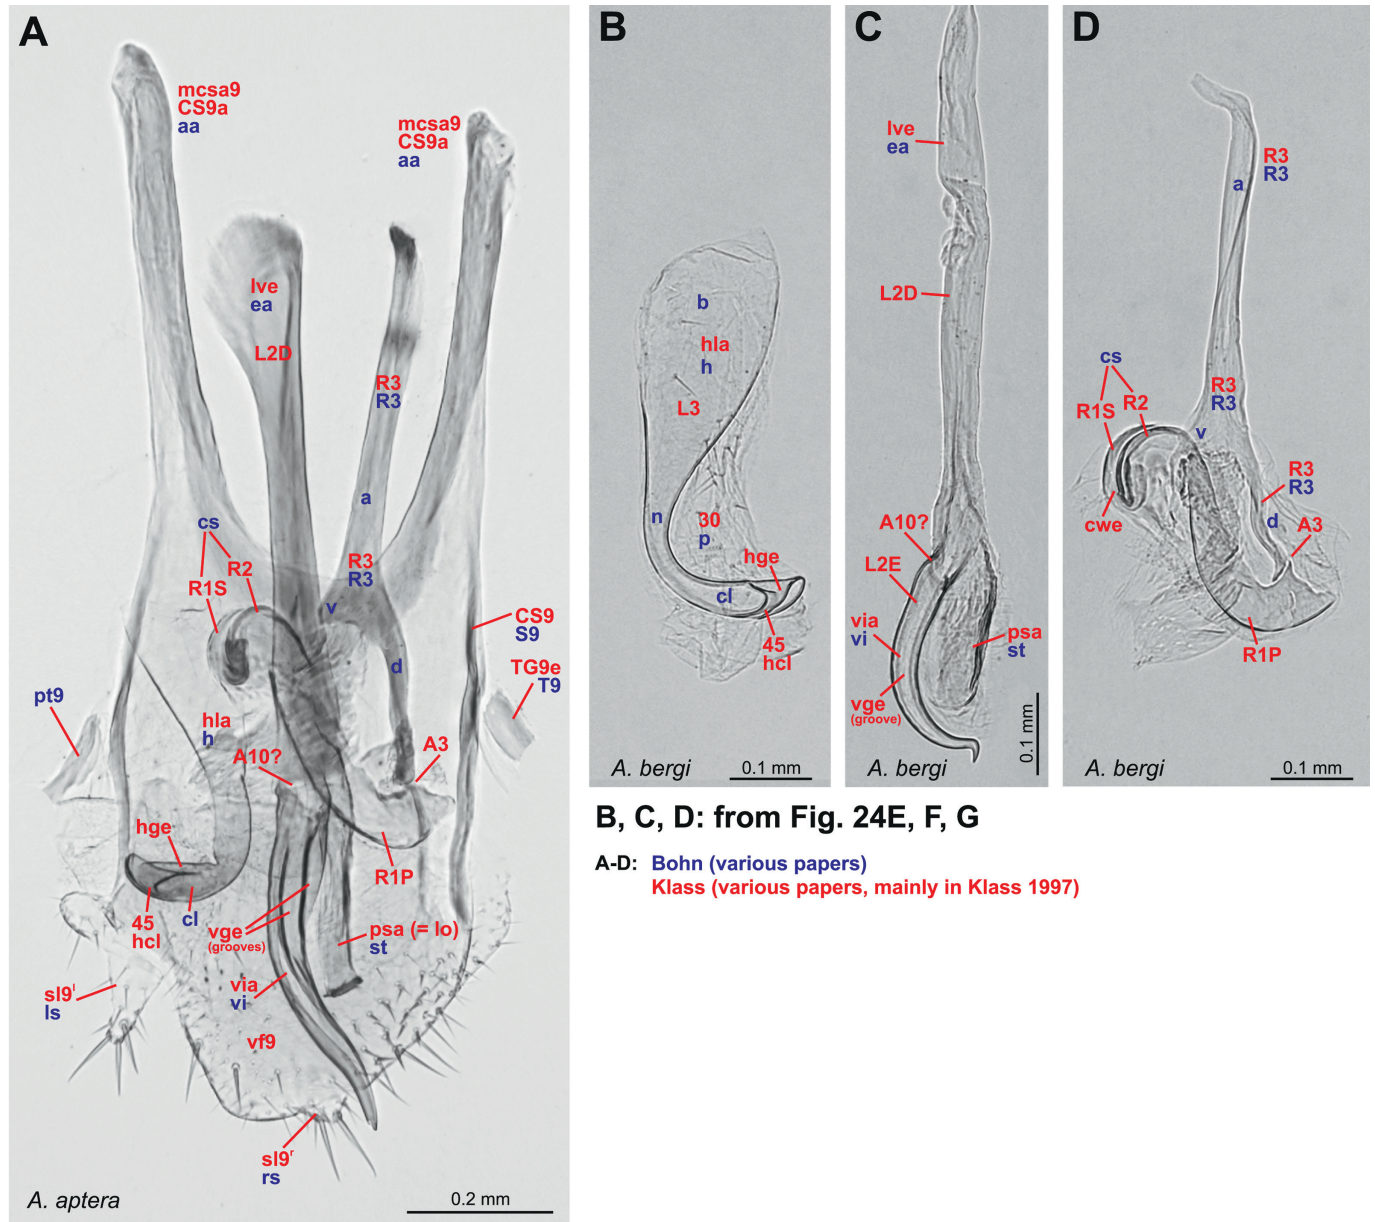

### A: from Fig. 24A

**Figure S3.** Terminologies for male genitalia and subgenital plate, exemplified by *Attaphila aptera* (Bo 1256) (A, identical with Fig. 24A) and *Attaphila bergi* (PT, Bo 1255) (B–D, identical with Fig. 24E–G). A–D: Terminologies of Bohn (various papers; in blue; only few parts named) and Klass (1997, see figs 262–290 therein; in red). — **Abbreviations:** See original papers for full meanings (partly given in Supplement 1), which are not relevant here.
